# Supplementary material for: A Xenogeneic-Free Protocol for Isolation and Expansion of Human Adipose Stem Cells for Clinical Uses
Source: PubMed Central journal article supplement (PMC3706484; doi:10.1371/journal.pone.0067870), 2013-07-09
Supplement: pone.0067870.s001.pdf [file pone.0067870.s001.pdf]

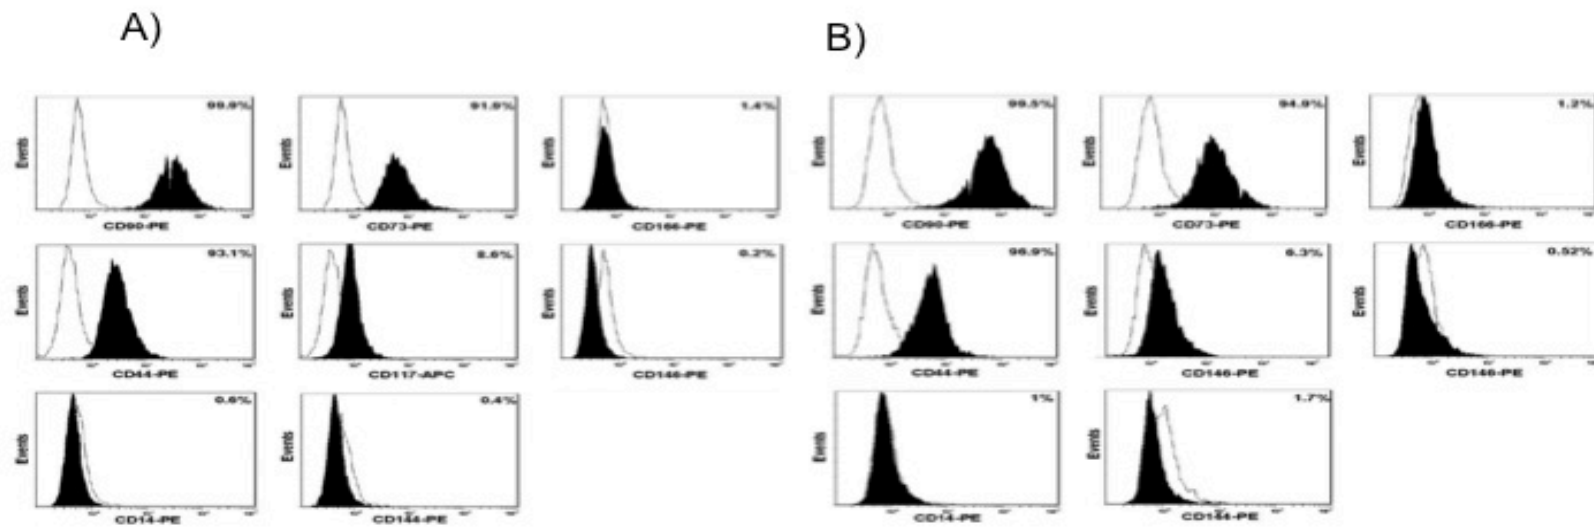

| MARKER | HUMAN SERUM | FETAL BOVINE SERUM |
|--------|-------------|--------------------|
| CD90   | 99.9%       | 99.5%              |
| CD73   | 91.9%       | 94.9%              |
| CD166  | 1.44%       | 1.2%               |
| CD44   | 93.1%       | 96.9%              |
| CD117  | 8.6%        | 6.3%               |
| CD146  | 0.2%        | 0.52%              |
| CD14   | 0.6%        | 1%                 |
| CD144  | 0.4%        | 1.7%               |
