# Supplementary material for: A Xenogeneic-Free Protocol for Isolation and Expansion of Human Adipose Stem Cells for Clinical Uses
Source: PubMed Central journal article supplement (PMC3706484; doi:10.1371/journal.pone.0067870), 2013-07-09
Supplement: pone.0067870.s003.pdf [file pone.0067870.s003.pdf]

| Gene                                                      | Primer sequences                                                 | Annealing Temperature | Size   | Detection         | Source                   |
|-----------------------------------------------------------|------------------------------------------------------------------|-----------------------|--------|-------------------|--------------------------|
| <b>HOUSEKEEPING GENES</b>                                 |                                                                  |                       |        |                   |                          |
| B-2Microglobulin                                          | F:CTCGCGCTACTCTCTCTTTCTG<br>R:GCTTACATGTCTCGATCCCACT             | 55°C                  | 335 pb | RT-PCR<br>QRT-PCR | -                        |
| <b>MESENCHYMAL STEM CELLS GENES</b>                       |                                                                  |                       |        |                   |                          |
| CD90                                                      | F: <b>CGCTCTCCTGCTAACAGTCTT</b><br>R: <b>CAGGCTGAACCTGACTGGA</b> | 60°C                  | 142 pb | QRT-PCR           | -                        |
| CD73                                                      | F: CTTAACGTGGGAGTGGAAAC<br>R: TCTAGCTGCCATTTGCACAC               | 60°C                  | 102 pb | QRT-PCR           | -                        |
| CD105                                                     | F: CTAAGTGGCAGGGGAGACAG<br>R: CTCCATGTGGCAGGAGCTA                | 60°C                  | 101 pb | QRT-PCR           | -                        |
| CD166                                                     | F: ATTGAAGTTTTATTGGCAGGAA<br>R: GGCTTAGCCATGCAAAACA              | 60°C                  | 102 pb | QRT-PCR           | -                        |
| CD13                                                      | F: CTCTCGATGGACAATGAACG<br>R: ATCTGCTGCCCTGTTGATTC               | 60°C                  | 100pb  | QRT-PCR           | -                        |
| <b>HEMATOPOIETIC STEM CELLS GENES</b>                     |                                                                  |                       |        |                   |                          |
| CD14                                                      | F: TCCAAGACAGAATAATGAATGGAC<br>R: CGAAAAGTCCCTCAACGTCCT          | 60°C                  | 76 pb  | QRT-PCR           | -                        |
| CD34                                                      | F: TCTGGATCAAAGTAGGCAGGA<br>R: GATCCAGCCTCAGAGGAAGA              | 60°C                  | 96 pb  | RT_PCR            | -                        |
| <b>DIFFERENTIATION ASSAY GENES</b>                        |                                                                  |                       |        |                   |                          |
| LPL                                                       | F:CAAAGCCCTGCTCGTGCTGA<br>R:CAGCCAGTCCACCACAATGA                 | 60°C                  | 334 pb | RT_PCR            | -                        |
| ADIPONECTIN                                               | F:TCCTTACAGAACACGCTTTCA<br>R:AGGCCACAGAACGAGAG                   | 60°C                  | 501 pb | RT_PCR            | -                        |
| FABP4/AP2                                                 | F: AATGGGATGGAAAATCAACCA<br>R:GTGGAAGTGACGCCTTTCAT               | 60°C                  | 88 pb  | RT_PCR            | -                        |
| PPARgamma                                                 | F:TCAGCGGGAAGGACTTTATGTATG<br>R:TCAGGTTTGGCCGGATGC               | 60°C                  | 147 pb | RT_PCR            | -                        |
| PLIN                                                      | F:GCAGTCAACAAAGCCCTCAC<br>R:AAGCTACTGGCGCTCTGCAC                 | 60°C                  | 200 pb | RT_PCR            | -                        |
| SREBF1/ADD1                                               | F:GGAGCCATGGATTGCACITTC<br>R:ATCCTTCAATGGAGTGGGTGCAG             | 60°C                  | 261 pb | RT_PCR            | -                        |
| LEPTIN                                                    | F: AATGCATTGGGGAACCCGT<br>R: CCAGTCTGTTGGATATTTGG                | 60°C                  | 305 pb | RT_PCR            | -                        |
| Aggrecan variant 1 (AG1). Cartilage differentiation       | F: GCAGAGACGCATCTAGAAATT<br>R: GGTAAATGCAGGGAACATCAT             | 55°C                  | 502 pb | RT_PCR            | Zuk <i>et al.</i> , 2002 |
| Aggrecan variant 2 (AG2). Cartilage differentiation       | F:GCAGAGACGCATCTAGAAATT<br>R:GGTAATTCAGGGAACATCAT                | 55°C                  | 616 pb | RT_PCR            | Zuk <i>et al.</i> , 2002 |
| Decorin (DEC). Cartilage differentiation                  | F: CCTTTGGTGAAGTTGGAACG<br>R: AAGATGTAATCCGTAAGGG                | 55°C                  | 306 pb | RT_PCR            | Zuk <i>et al.</i> , 2002 |
| Biglycan. Cartilage differentiation                       | F: TGCAGAACAACGACATCTCC<br>R: AGCTTGGAGTAGCGAAGCAG               | 55°C                  | 346 pb | RT_PCR            | Zuk <i>et al.</i> , 2002 |
| Collagen type X alpha1 (CN10). Cartilage differentiation. | F: TGGAGTGGGAAAAAGAGGTG<br>R: GTCCTCCAACCTCAGGATCA               | 55°C                  | 599 pb | RT_PCR            | Zuk <i>et al.</i> , 2002 |
